# Supplementary material
Source: Springer Nature journal article supplement (https://www.springermedizin.de/resource/supplementary/13006_2013_183_MOESM2_ESM.pdf/9628154)
Supplement: MOESM2 [file 9628154]

**The Process-oriented training for health professionals for IG**

Mothers assessed for eligibility (n=584)

- Excluded (n=19)
- Not meeting inclusion criteria (n=3)
  - Declined to participate (n=16)
  - Other reasons (n=0)

Mothers included (n=565)

**Questionnaire 3 days postpartum**  
Allocated to IG (n=206)

**Allocation**

**Questionnaire 3 days postpartum**  
Allocated to CGA (n=162) and to CGB (n=172)

**Questionnaire 3 months postpartum**  
Allocated to IG (n=206)

**Follow-Up**

**Questionnaire 3 months postpartum**  
Allocated to CGA (n=162) and to CGB (n=172)

**Questionnaire 9 months postpartum**  
Allocated to IG (n=206)

**Follow-Up**

**Questionnaire 9 months postpartum**  
Allocated to CGA (n=162) and to CGB (n=172)

**Analysis**
